# Supplementary material
Source: publisher site journal article supplement (http://www.degruyter.com/publication/journal_key/DEMO/downloadAsset/DEMO_CFP%2040th%20Linz%20Seminar%20on%20Fuzzy%20Set%20Theory.pdf)
Supplement: Supplementary file 1 [file DEMO_CFP%2040th%20Linz%20Seminar%20on%20Fuzzy%20Set%20Theory.pdf]

SPECIAL ISSUE

## 40th Linz Seminar on Fuzzy Set Theory: Copulas – Theory and Applications

### GUEST EDITORS

---

Fabrizio Durante - Susanne Saminger-Platz - Wolfgang Trutschnig

### DESCRIPTION

---

The special issue is linked to the "40th Linz Seminar on Fuzzy Set Theory" dedicated to "Copulas: Theory and Applications" which has taken place from June 6-9, 2023 in Linz, Austria. The seminar has been organized by the Institute of Mathematical Methods in Medicine and Data-Based Modeling of the Johannes Kepler University Linz.

The goal of the seminar has been to present and to discuss recent advances of copulas and their applications in pure and applied fields as well as their relationship to other aggregation functions such as quasi-copulas, semicopulas, distribution functions, but also triangular norms and uninorms (more details are available at [www.flll.jku.at/linz2023](http://www.flll.jku.at/linz2023)).

Original research contributions, not published elsewhere, and survey articles related to the topics discussed at the Linz seminar are welcome to this special issue. We require that an author resp. at least one of the co-authors has been participating in the Linz Seminar.

### HOW TO SUBMIT

---

All submissions to the special issue must be made electronically at [www.editorialmanager.com/depmod](http://www.editorialmanager.com/depmod) and will undergo the standard peer review process. When submitting your paper please choose "SI: 40th Linz Seminar".

**The deadline for the submissions is December 31, 2023**, but individual papers will be reviewed and published online on an ongoing basis.

Contributors to this Special Issue will benefit from:

No Copyright constraints

Unlimited and free Open Access for all readers

Fair and constructive peer review provided by experts in the field

Fast online publication of articles

Free language assistance for authors from non-English speaking regions

We are looking forward to your submission. If you have any question, please contact us at

[demo.editorial@degruyter.com](mailto:demo.editorial@degruyter.com)
